logbook numbers and ARCP outcomes were compared between pre-COVID dates. Effect sizes are reported as incident rate ratios (IRR) with 95% confidence intervals (CI).

**Results:** 5599 surgical trainees in 2019 and 5310 in 2020 in surgical specialty training were included. The IRR was reduced across all subspecialties because of the COVID-19 pandemic (0.55; 95% CI 0.53-0.57). Elective surgery (0.60; 95% CI 0.59-0.61) was affected more than emergency surgery (0.88; 95% CI 0.86-0.89). Regional variance with reduced operative activity was demonstrated across all specialities. 1 in 8 in their final year of training have not been able to achieve curriculum requirements and have had training extended. 1 in 4 trainees entering their final year of training are behind their expected training trajectory.

**Conclusion:** COVID-19 continues to have a significant impact on surgical training in the UK. Urgent, co-ordinated action is required by key stakeholders to mitigate for these effects and maintain future surgical training.

### SP10.2.6

#### The Quantitative Impact of COVID-19 on surgical training in the United Kingdom

Joshua Clements<sup>1</sup>, Joshua Burke<sup>1,2</sup>, Carly Hope<sup>3</sup>, Deirdre Nally<sup>1</sup>, Gareth Griffiths<sup>4</sup>, Jon Lund<sup>4</sup>

<sup>1</sup>The Association of Surgeons in Training (ASIT), London, UK, <sup>2</sup>John Goligher Department of Colorectal Surgery, Leeds Teaching Hospital Trust, UK, <sup>3</sup>Division of Medical Sciences and Graduate Entry Medicine, University of Nottingham, UK, <sup>4</sup>Joint Committee on Surgical Training (JCST)

**Aims:** COVID-19 has had a global impact on all aspects of healthcare including surgical teaching and training. This study aimed to quantify the impact of COVID-19 on operative case numbers recorded by surgeons in training, and annual review of competency progression (ARCP) outcomes in the United Kingdom.

**Methods:** Anonymised operative logbook numbers were collated from e-logbook and ARCP outcome data were collated from the Intercollegiate Surgical Curriculum Programme (ISCP) database for trainees across core and the ten higher surgical specialities. Operative
